# Supplementary material for: Hypnotic prescription trends and patterns for the treatment of insomnia in Japan: analysis of a nationwide Japanese claims database
Source: PubMed Central journal article supplement (PMC10120113; doi:10.1186/s12888-023-04683-2), 2023-04-20
Supplement: 12888_2023_4683_MOESM1_ESM.pdf [file 12888_2023_4683_MOESM1_ESM.pdf]

## SUPPLEMENTAL INFORMATION

Hypnotic prescription trends and patterns for the treatment of insomnia in Japan: analysis of a nationwide Japanese claims database

Shoki Okuda, Zaina P. Qureshi, Yukiko Yanagida, Chie Ito, Yuji Homma, Shigeru Tokita

| <b>Contents</b>                                                                                                                           | <b>Page</b> |
|-------------------------------------------------------------------------------------------------------------------------------------------|-------------|
| <b>Table S1</b> Profile of insomnia patients prescribed hypnotics in the JMDC Claims Database from 2010–2019 by fiscal year               | 2           |
| <b>Table S2</b> Proportions of new users of hypnotics by age and sex per analysis period                                                  | 3           |
| <b>Table S3</b> Proportions of long-term users of hypnotics by age and sex, per analysis period                                           | 4           |
| <b>Figure S1</b> Trends in prescriptions of hypnotics among new users of hypnotics by age                                                 | 5           |
| <b>Figure S2</b> Trends in prescriptions of hypnotics among new users of hypnotics by sex                                                 | 6           |
| <b>Figure S3</b> Trends in prescriptions of hypnotics among new users of hypnotics by medical specialty                                   | 7           |
| <b>Figure S4</b> Distribution of MOAs among new users by age (a), sex (b), psychiatric comorbidities (c), and medical specialty (d)       | 8           |
| <b>Figure S5</b> Trends in prescriptions of hypnotics among long-term users of hypnotics by age                                           | 9           |
| <b>Figure S6</b> Trends in prescriptions of hypnotics among long-term users of hypnotics by sex                                           | 10          |
| <b>Figure S7</b> Trends in prescriptions of hypnotics among long-term users of hypnotics by medical specialty                             | 11          |
| <b>Figure S8</b> Distribution of MOAs among long-term users by age (a), sex (b), psychiatric comorbidities (c), and medical specialty (d) | 12          |

**Table S1** Profile of insomnia patients prescribed hypnotics in the JMDC Claims Database from 2010–2019 by fiscal year

| <b>Year</b> | <b>Subjects registered in JMDC Claims Database</b> | <b>Patients with diagnosis of insomnia</b> | <b>Patients with diagnosis of insomnia and prescribed <math>\geq 1</math> hypnotic</b> | <b>Study cohort: All users</b> | <b>Study cohort: New users</b> | <b>Study cohort: Long-term users</b> |
|-------------|----------------------------------------------------|--------------------------------------------|----------------------------------------------------------------------------------------|--------------------------------|--------------------------------|--------------------------------------|
|             | <b>N</b>                                           | <b>N (%)</b>                               | <b>N (%)</b>                                                                           | <b>N</b>                       | <b>N</b>                       | <b>N</b>                             |
| 2010        | 932,265                                            | 36,817 (3.9)                               | 14,739 (1.6)                                                                           | 5521                           | 1880                           | 795                                  |
| 2011        | 1,109,462                                          | 56,359 (5.1)                               | 22,982 (2.1)                                                                           | 9591                           | 3164                           | 1500                                 |
| 2012        | 1,567,889                                          | 74,576 (4.8)                               | 31,658 (2.0)                                                                           | 13,645                         | 4482                           | 1980                                 |
| 2013        | 2,448,338                                          | 107,898 (4.4)                              | 47,192 (1.9)                                                                           | 21,516                         | 5990                           | 3524                                 |
| 2014        | 2,613,490                                          | 115,905 (4.4)                              | 51,903 (2.0)                                                                           | 36,954                         | 9858                           | 6282                                 |
| 2015        | 3,720,120                                          | 175,091 (4.7)                              | 81,182 (2.2)                                                                           | 40,997                         | 10,598                         | 6970                                 |
| 2016        | 4,597,101                                          | 221,555 (4.8)                              | 105,089 (2.3)                                                                          | 67,090                         | 16,720                         | 12,015                               |
| 2017        | 5,389,907                                          | 269,157 (5.0)                              | 130,800 (2.4)                                                                          | 88,858                         | 22,222                         | 15,705                               |
| 2018        | 6,148,904                                          | 317,112 (5.2)                              | 156,062 (2.5)                                                                          | 108,317                        | 26,575                         | 19,231                               |
| 2019        | 5,948,817                                          | 321,048 (5.4)                              | 156,691 (2.6)                                                                          | 123,727                        | 28,688                         | 23,213                               |

Fiscal year = April 1<sup>st</sup>–March 31<sup>st</sup>

**Table S2** Proportions of new users of hypnotics by age and sex per analysis period

| Analysis period |          | 2010            | 2011            | 2012            | 2013            | 2014            | 2015            | 2016            | 2017              | 2018              | 2019              |
|-----------------|----------|-----------------|-----------------|-----------------|-----------------|-----------------|-----------------|-----------------|-------------------|-------------------|-------------------|
| N               |          | 1880            | 3164            | 4482            | 5990            | 9858            | 10,598          | 16,720          | 22,222            | 26,575            | 28,688            |
| Age             | 20–34 yr | 480<br>(25.5%)  | 787<br>(24.9%)  | 1115<br>(24.9%) | 1418<br>(23.7%) | 2377<br>(24.1%) | 2530<br>(23.9%) | 3861<br>(23.1%) | 5070<br>(22.8%)   | 6719<br>(25.3%)   | 7858<br>(27.4%)   |
|                 | 35–49 yr | 765<br>(40.7%)  | 1315<br>(41.6%) | 1861<br>(41.5%) | 2385<br>(39.8%) | 3920<br>(39.8%) | 4246<br>(40.1%) | 6316<br>(37.8%) | 8158<br>(36.7%)   | 9607<br>(36.2%)   | 10,172<br>(35.5%) |
|                 | 50–64 yr | 534<br>(28.4%)  | 905<br>(28.6%)  | 1247<br>(27.8%) | 1765<br>(29.5%) | 2934<br>(29.8%) | 3155<br>(29.8%) | 5471<br>(32.7%) | 7423<br>(33.4%)   | 8612<br>(32.4%)   | 9145<br>(31.9%)   |
|                 | 65–74 yr | 101<br>(5.4%)   | 157<br>(5.0%)   | 259<br>(5.8%)   | 422<br>(7.0%)   | 627<br>(6.4%)   | 667<br>(6.3%)   | 1072<br>(6.4%)  | 1571<br>(7.1%)    | 1637<br>(6.2%)    | 1513<br>(5.3%)    |
| Sex             | Male     | 1064<br>(56.6%) | 1702<br>(53.8%) | 2487<br>(55.5%) | 3268<br>(54.6%) | 5551<br>(56.3%) | 5932<br>(56.0%) | 9232<br>(55.2%) | 12,207<br>(54.9%) | 14,426<br>(54.3%) | 15,466<br>(53.9%) |
|                 | Female   | 816<br>(43.4%)  | 1462<br>(46.2%) | 1995<br>(44.5%) | 2722<br>(45.4%) | 4307<br>(43.7%) | 4666<br>(44.0%) | 7488<br>(44.8%) | 10,015<br>(45.1%) | 12,149<br>(45.7%) | 13,222<br>(46.1%) |

**Table S3** Proportions of long-term users of hypnotics by age and sex per analysis period

| Analysis period |          | 2010           | 2011           | 2012            | 2013            | 2014            | 2015            | 2016            | 2017            | 2018              | 2019              |
|-----------------|----------|----------------|----------------|-----------------|-----------------|-----------------|-----------------|-----------------|-----------------|-------------------|-------------------|
| N               |          | 795            | 1500           | 1980            | 3524            | 6282            | 6970            | 12,015          | 15,705          | 19,231            | 23,213            |
| Age             | 20–34 yr | 89<br>(11.2%)  | 207<br>(13.8%) | 243<br>(12.3%)  | 399<br>(11.3%)  | 674<br>(10.7%)  | 786<br>(11.3%)  | 1283<br>(10.7%) | 1580<br>(10.1%) | 1976<br>(10.3%)   | 2511<br>(10.8%)   |
|                 | 35–49 yr | 346<br>(43.5%) | 609<br>(40.6%) | 824<br>(41.6%)  | 1384<br>(39.3%) | 2452<br>(39.0%) | 2655<br>(38.1%) | 4271<br>(35.5%) | 5726<br>(36.5%) | 6937<br>(36.1%)   | 8271<br>(35.6%)   |
|                 | 50–64 yr | 278<br>(35.0%) | 542<br>(36.1%) | 717<br>(36.2%)  | 1246<br>(35.4%) | 2369<br>(37.7%) | 2737<br>(39.3%) | 5206<br>(43.3%) | 6772<br>(43.1%) | 8453<br>(44.0%)   | 10,341<br>(44.5%) |
|                 | 65–74 yr | 82<br>(10.3%)  | 142<br>(9.5%)  | 196<br>(9.9%)   | 495<br>(14.0%)  | 787<br>(12.5%)  | 792<br>(11.4%)  | 1255<br>(10.4%) | 1627<br>(10.4%) | 1865<br>(9.7%)    | 2090<br>(9.0%)    |
| Sex             | Male     | 425<br>(53.5%) | 822<br>(54.8%) | 1093<br>(55.2%) | 1901<br>(53.9%) | 3332<br>(53.0%) | 3775<br>(54.2%) | 6584<br>(54.8%) | 8634<br>(55.0%) | 10,443<br>(54.3%) | 12,457<br>(53.7%) |
|                 | Female   | 370<br>(46.5%) | 678<br>(45.2%) | 887<br>(44.8%)  | 1623<br>(46.1%) | 2950<br>(47.0%) | 3195<br>(45.8%) | 5431<br>(45.2%) | 7071<br>(45.0%) | 8788<br>(45.7%)   | 10,756<br>(46.3%) |

**Figure S1** Trends in prescriptions of hypnotics among new users of hypnotics by age

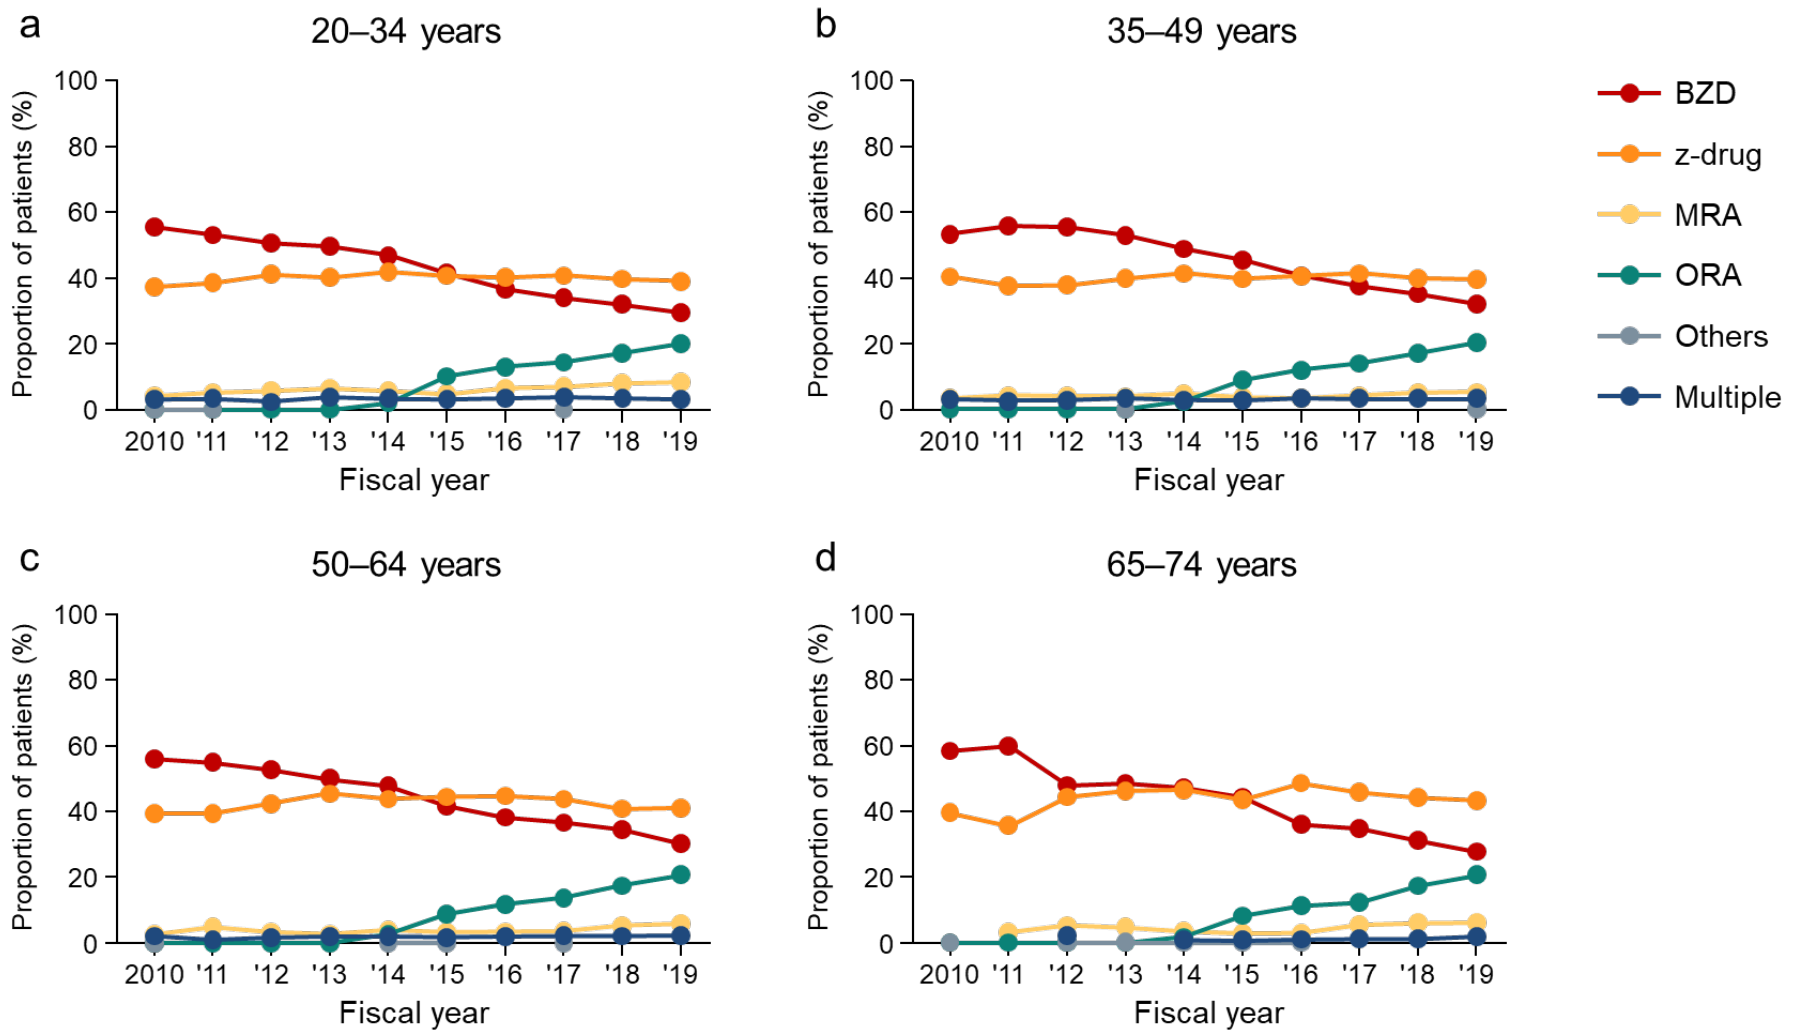

BZD benzodiazepine, MRA melatonin receptor agonist, ORA orexin receptor antagonist, z-drug non-benzodiazepine

**Figure S2** Trends in prescriptions of hypnotics among new users of hypnotics by sex

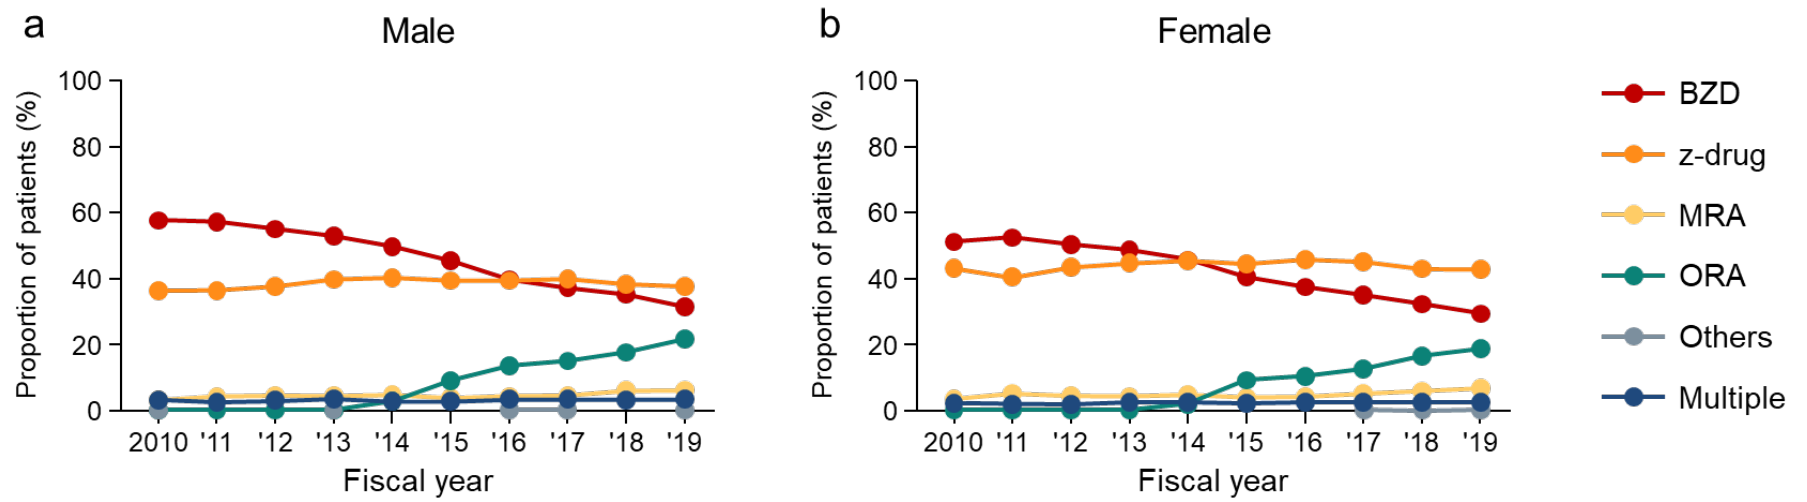

*BZD* benzodiazepine, *MRA* melatonin receptor agonist, *ORA* orexin receptor antagonist, *z-drug* non-benzodiazepine

**Figure S3** Trends in prescriptions of hypnotics among new users of hypnotics by medical specialty

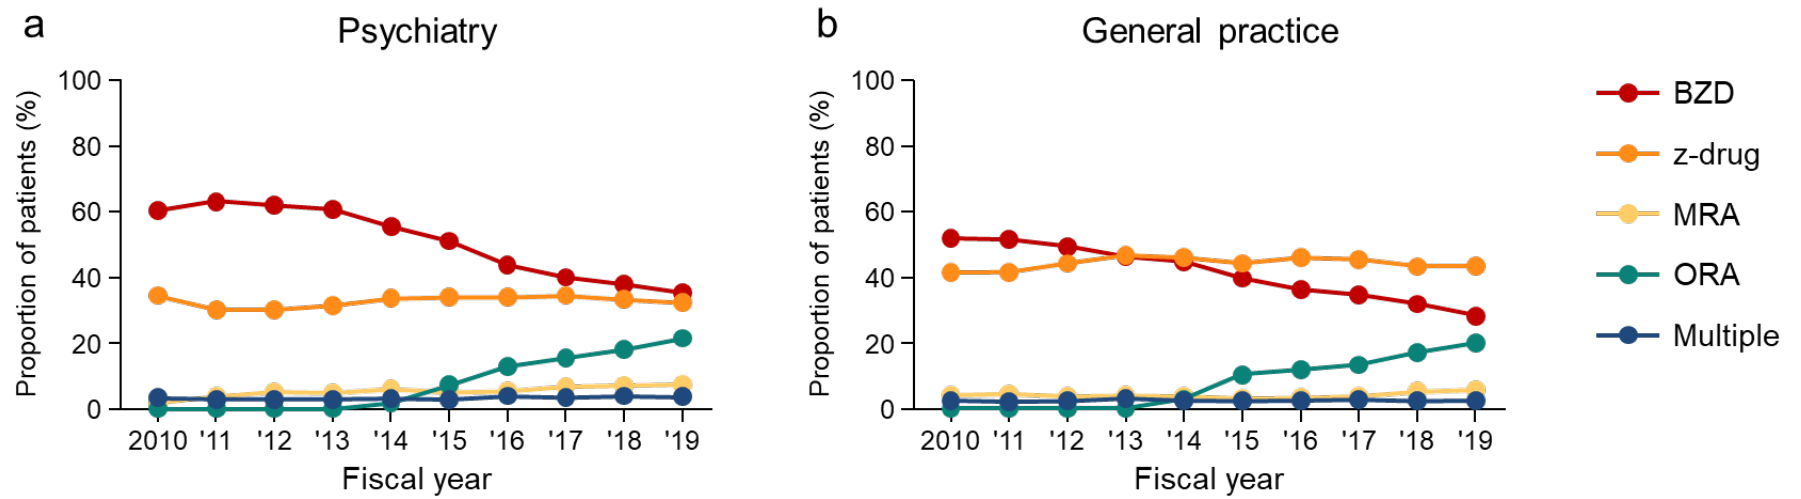

*BZD* benzodiazepine, *MRA* melatonin receptor agonist, *ORA* orexin receptor antagonist, *z-drug* non-benzodiazepine

**Figure S4** Distribution of MOAs among new users by age (a), sex (b), psychiatric comorbidities (c), and medical specialty (d)

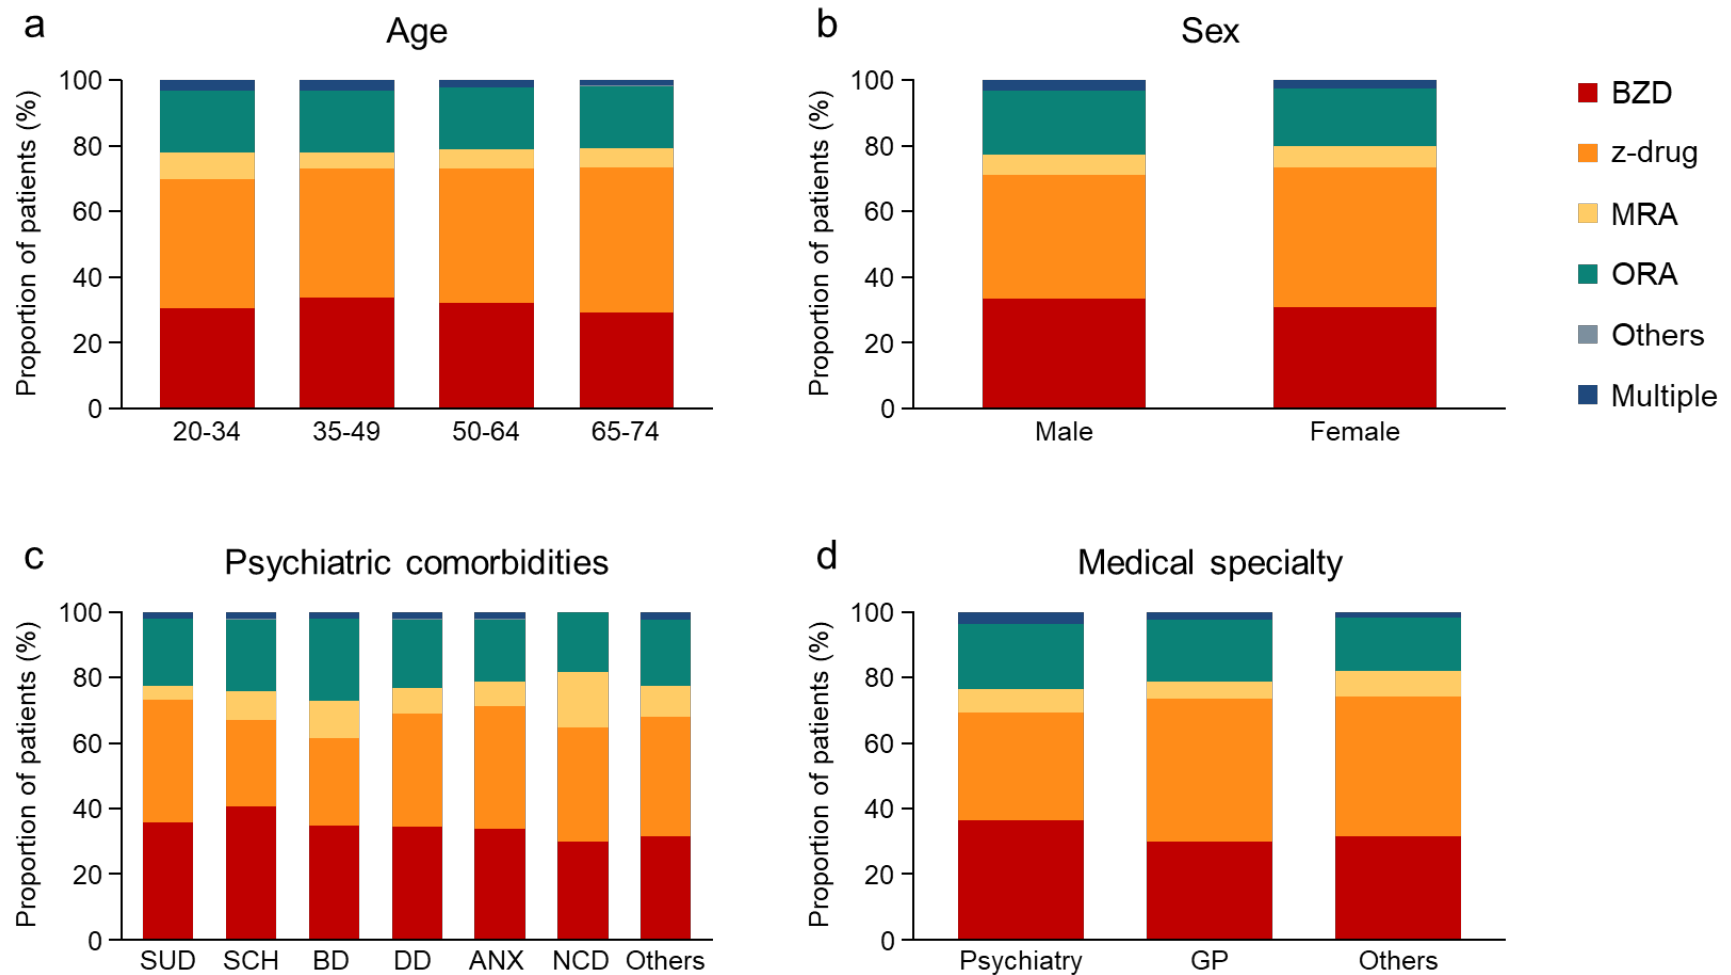

*ANX* anxiety disorders, *BD* bipolar disorders, *BZD* benzodiazepine, *DD* depressive disorders, *GP* general practice, *MOA*, mechanisms of action, *MRA* melatonin receptor agonist, *NCD* neurocognitive disorders (Alzheimer's disease), *ORA* orexin receptor antagonist, *SCH* schizophrenia spectrum disorders, *SUD* substance use disorders, *z-drug* non-benzodiazepine



**Figure S5** Trends in prescriptions of hypnotics among long-term users of hypnotics by age

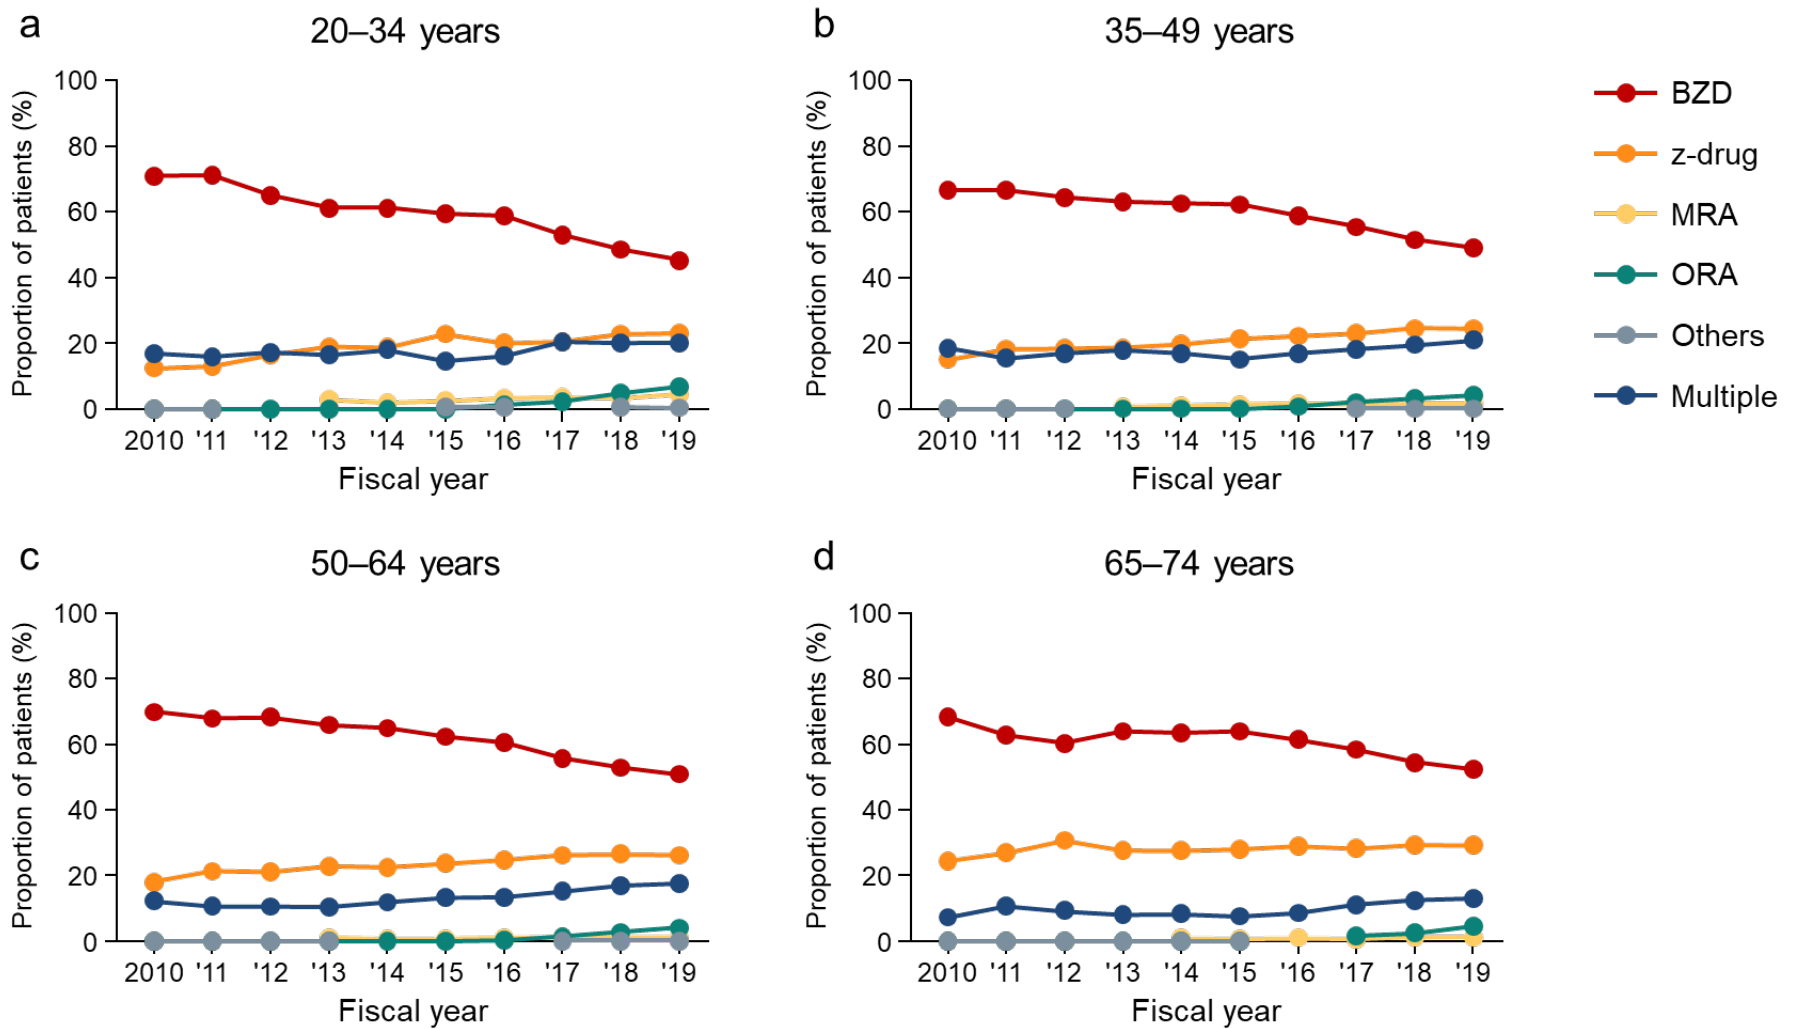

*BZD* benzodiazepine, *MRA* melatonin receptor agonist, *ORA* orexin receptor antagonist, *z-drug* non-benzodiazepine

**Figure S6** Trends in prescriptions of hypnotics among long-term users of hypnotics by sex

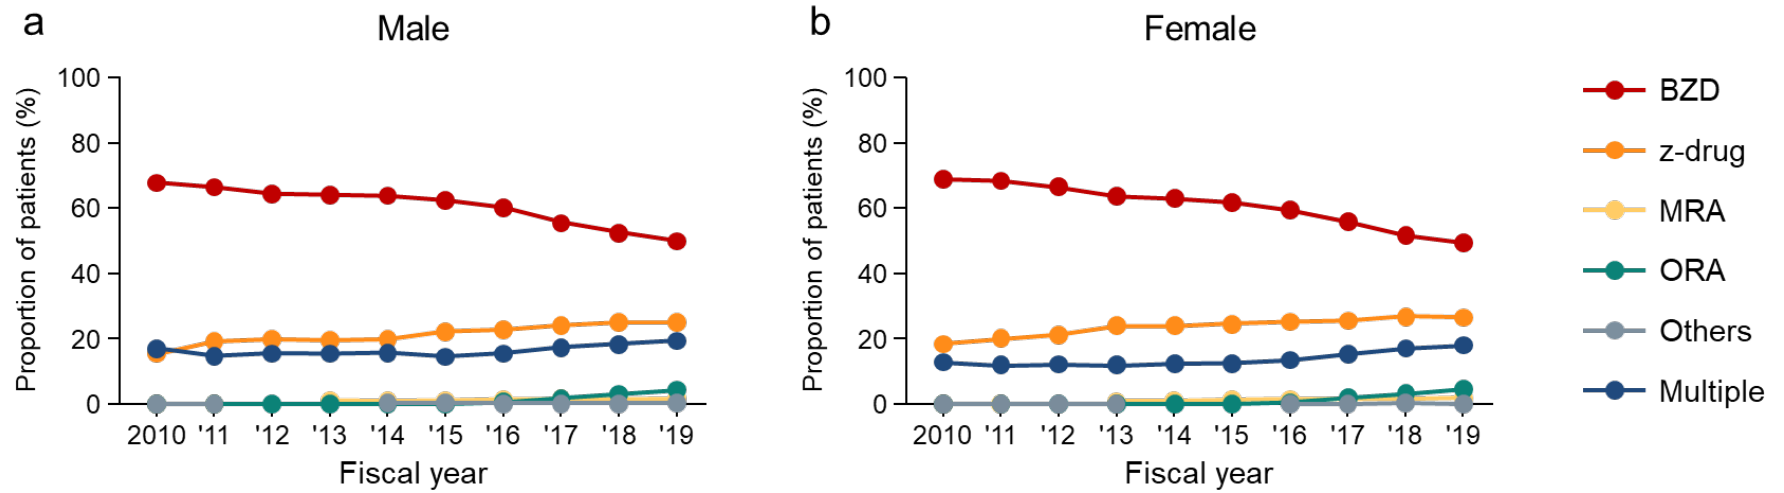

*BZD* benzodiazepine, *MRA* melatonin receptor agonist, *ORA* orexin receptor antagonist, *z-drug* non-benzodiazepine

**Figure S7** Trends in prescriptions of hypnotics among long-term users of hypnotics by medical specialty

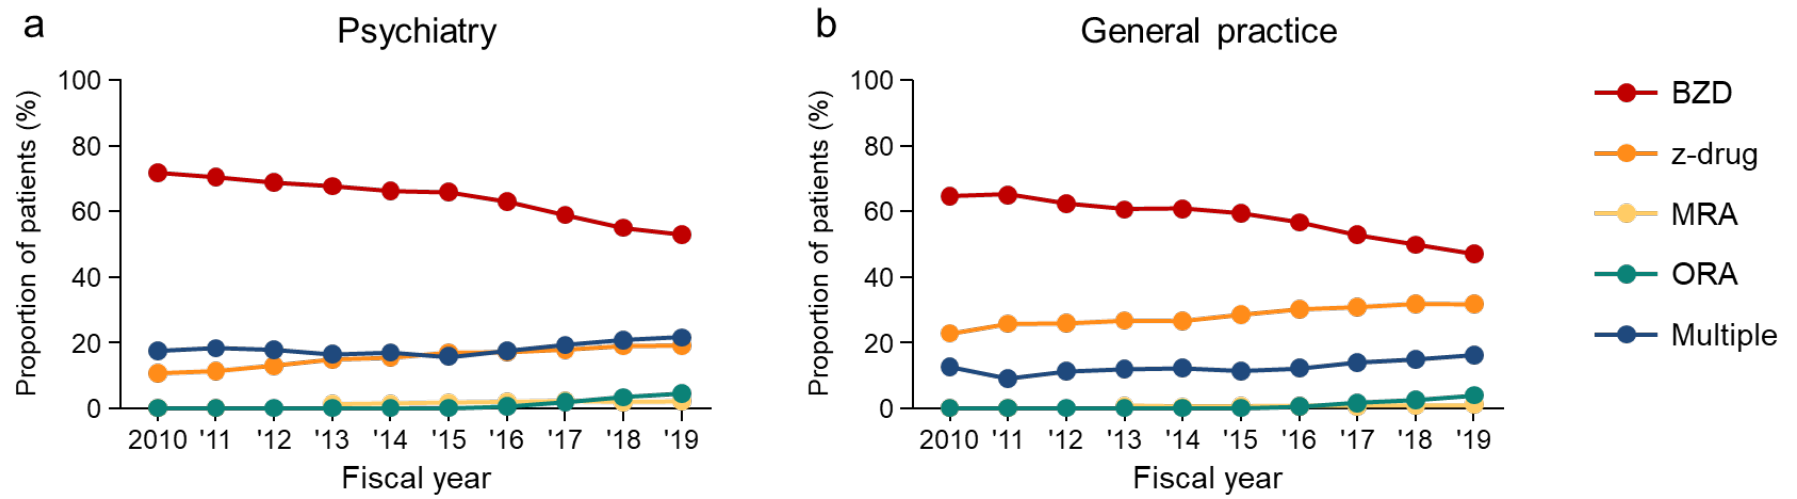

*BZD* benzodiazepine, *MRA* melatonin receptor agonist, *ORA* orexin receptor antagonist, *z-drug* non-benzodiazepine

**Figure S8** Distribution of MOAs among long-term users by age (a), sex (b), psychiatric comorbidities (c), and medical specialty (d)

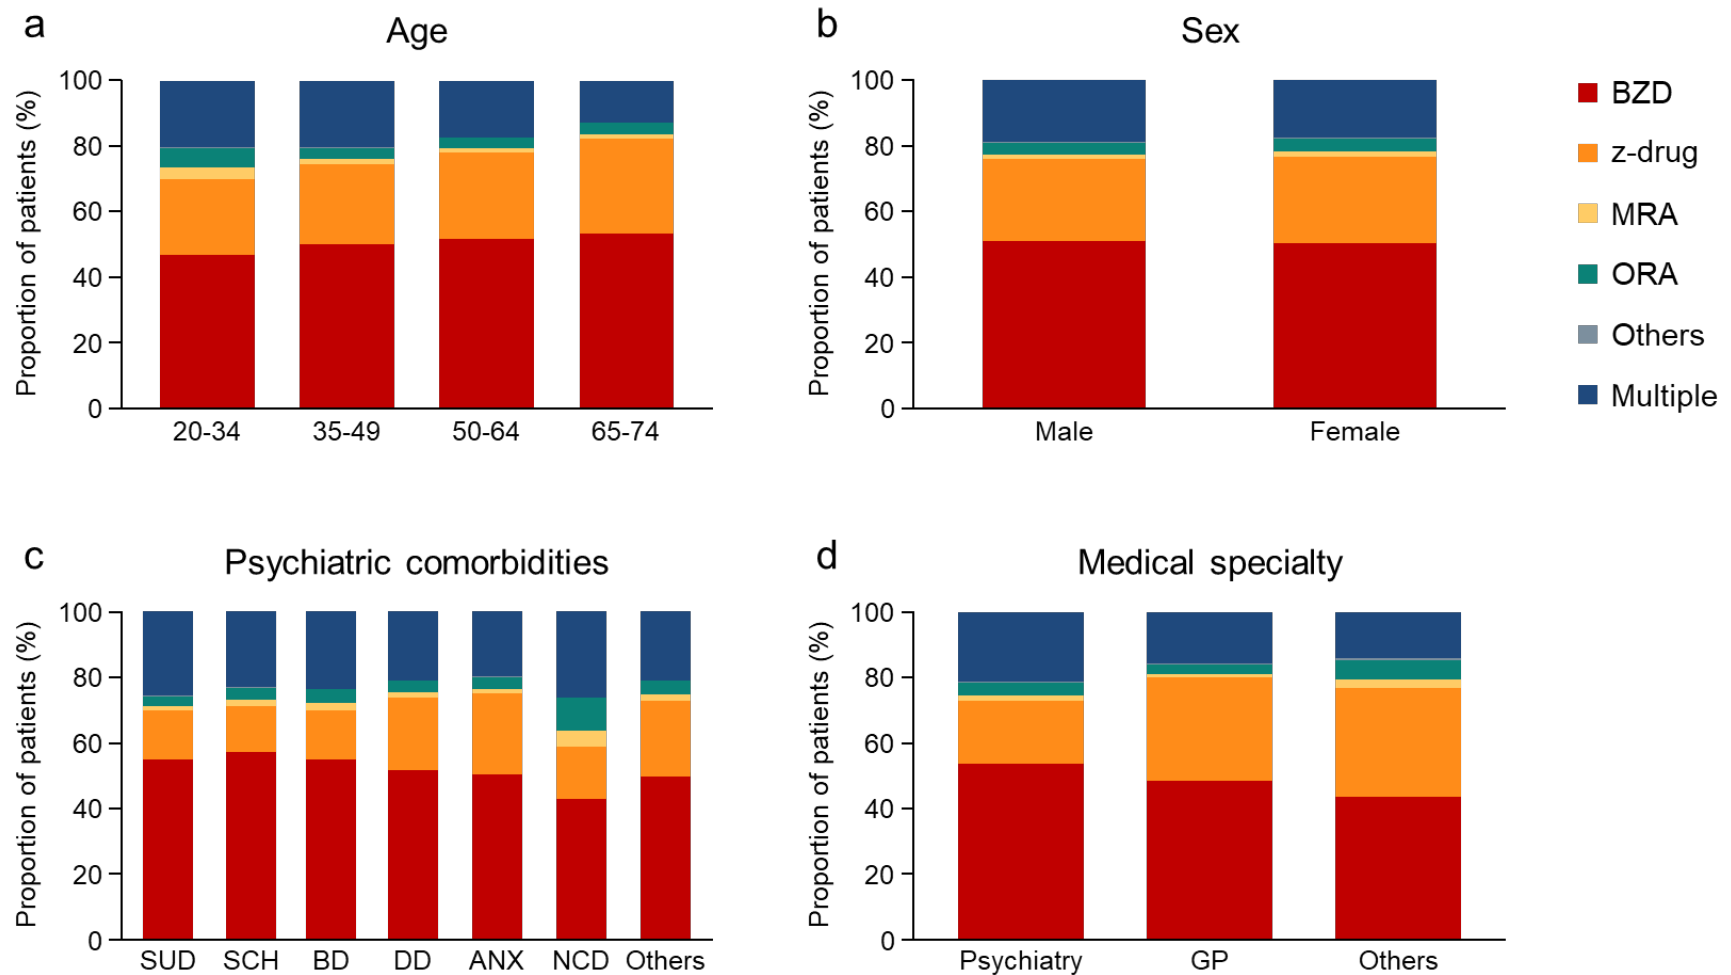

*ANX* anxiety disorders, *BD* bipolar disorders, *BZD* benzodiazepine, *DD* depressive disorders, *GP* general practice, *MOA*, mechanisms of action, *MRA* melatonin receptor agonist, *NCD* neurocognitive disorders (Alzheimer's disease), *ORA* orexin receptor antagonist, *SCH* schizophrenia spectrum disorders, *SUD* substance use disorders, *z-drug* non-benzodiazepine
